# Supplementary material for: Geographic variation in gene flow from a genetically distinct migratory ecotype drives population genetic structure of coastal Atlantic cod (Gadus morhua L.)
Source: PubMed Central journal article supplement (PMC9309456; doi:10.1111/eva.13422), 2022-06-21
Supplement: EVA-15-1162-s001.pdf [file EVA-15-1162-s001.pdf]

Supplementary materials

| Assay | SNP_ID | 2nd-PCR                         | 1st-PCR                          | UEP_SEQ                    | EXTI CALL |
|-------|--------|---------------------------------|----------------------------------|----------------------------|-----------|
| W1    | 8-66   | ACGTTGGATGIAAACCTTCACCTACTCCC   | ACGTTGGATGGATTCAITCTGAGAAGAGCC   | CTACTCCCCCAITTTG           | C         |
| W1    | 7-52   | ACGTTGGATGTGTGTTAACAGGACTGCTGG  | ACGTTGGATGTGTGTTAACATCCCCACTTGC  | ATCAGATGTCAACCCAC          | A         |
| W1    | 14-201 | ACGTTGGATGAAGTGTGTTAGTGGTGGTGG  | ACGTTGGATGACCATGAAGAGGTTTCATGGC  | GCACAAAGGTACAGAAAG         | C         |
| W1    | 8-194  | ACGTTGGATGCGAGGCTGCTTAGTCAITTTG | ACGTTGGATGACGACGCCAGGATTTATCTC   | CGCTGCAAAATCTGCTAA         | G         |
| W1    | 8-60   | ACGTTGGATGAAGCAAAGTGCAGCCTTTCC  | ACGTTGGATGGGAAAATGCTGCACAATAGG   | GGTACACACTACAGGAG          | T         |
| W1    | 1-13   | ACGTTGGATGGTGACTTAGGTGAGAAAACG  | ACGTTGGATGATTGCTACGGAGGTGACTG    | gAAGGGATGTCAITGAGT         | C         |
| W1    | 1-6    | ACGTTGGATGCTCTCCAGAACATACTGAG   | ACGTTGGATGTTGGATCTGCAGACCCITG    | TCTCCTTGCAATGTGCA          | C         |
| W1    | 12-75  | ACGTTGGATGTTGAGTAGTTAGGACCGTAG  | ACGTTGGATGTTGGGCTGATCTACCAAAG    | TTAGGACCGTAGTGTACTG        | C         |
| W1    | 3-81   | ACGTTGGATGCTTGTCTTCTGTACAGAGG   | ACGTTGGATGTGAGCACTTACTGTGAGAG    | ttTTCCTCCCTGTTTGAA         | C         |
| W1    | 8-63   | ACGTTGGATGGCGAGAAATAGAAGGAAAGGG | ACGTTGGATGTTCAAITGCTGCAGTGGGAC   | GGACATAATGTCTTGTATTG       | G         |
| W1    | 11-200 | ACGTTGGATGCACCTCACATGGCCTAAATA  | ACGTTGGATGAGCTCTGCATGTCTTAAAC    | gGGACAGATAAAAACGGTAGA      | C         |
| W1    | 15-147 | ACGTTGGATGTAGCATGACGCTACGCTAAG  | ACGTTGGATGAAGCGCTCCATGCTATATG    | tGAAGACAAACTATCGCTAAA      | G         |
| W1    | 5-92   | ACGTTGGATGCTTTGGCCGTCCTTACAAAAC | ACGTTGGATGGGTACAAAGATAATATGCTG   | GGCCGTCCTTACAAACTATACC     | C         |
| W1    | 11-129 | ACGTTGGATGCTTGTCTCCGGCAACAAGAAC | ACGTTGGATGTGGTCTGTGTGGTATGGTTC   | ttCTCCAGCCGCTCTGGACCA      | A         |
| W1    | 16-151 | ACGTTGGATGGGCTGTCTTTGTATCCATGC  | ACGTTGGATGGATACGTTGGAAGACAGGAC   | ggTGTATCCATGCAATACAAAAC    | A         |
| W1    | 8-230  | ACGTTGGATGTGAGCGTTCAAAGGAAGGAGG | ACGTTGGATGGAATCGAACGCAAACTAGGG   | AAGGAGGGCTGCGTGAACGAC      | C         |
| W1    | 7-51   | ACGTTGGATGGGCATGTTATGCGCAACACAG | ACGTTGGATGCGAGTCTGCTATGAGTGG     | AAACAGCAGCCAGCAGTACATG     | A         |
| W1    | 16-204 | ACGTTGGATGTGAAGATAGACAGGAGCTTG  | ACGTTGGATGCACACTCACACAGACTACAC   | GATAGACAGGAGCTTGTATTTTG    | G         |
| W1    | 11-245 | ACGTTGGATGTCTGCTATGGGTTTCATAC   | ACGTTGGATGGCAGTGGATATATTCATCAG   | TACATTACACTTTAACTGCTCTG    | A         |
| W1    | 1-11   | ACGTTGGATGAATGCCCTTCTGGAAATCTC  | ACGTTGGATGATACCAGTAGGATTGCCAGC   | GCCCTTCTGGAAATCTCAGTTATT   | C         |
| W1    | 23-185 | ACGTTGGATGGGTGCATGCTGCGTAGATAT  | ACGTTGGATGGTTCGGGTTTTTATCCAG     | aaATGCTGCGTAGATATAAGAAAA   | C         |
| W1    | 13-248 | ACGTTGGATGTGACGCTACAGAAACACTGG  | ACGTTGGATGAGGGAAACAACCGCCTCAG    | ACAGGAGCAGCGTGTGGAGCTCG    | G         |
| W1    | 18-161 | ACGTTGGATGTGATCCGATCCACCTGAACG  | ACGTTGGATGATTCCAGATTTGAGGTCGG    | CGCAGACCTCACAGGGATGTGCG    | C         |
| W1    | 17-206 | ACGTTGGATGACTTTCTCGGTAAAGAGCCC  | ACGTTGGATGAAAACCAATTGGGTTTGTGG   | CCTCCGCTTCTAACCTGTATAATG   | A         |
| W1    | 20-232 | ACGTTGGATGTCTACCGAAGTTTGGAGAC   | ACGTTGGATGTCTGCTCTCATACAGAGTC    | GATTAATAACTATACTGCAACAAAT  | C         |
| W1    | 2-28   | ACGTTGGATGGGAGTAGGAGCCACCTATG   | ACGTTGGATGCTTCTCCAGGAGATGAACC    | AGGGGAGCCCTTCAGGGGCGCGCTT  | C         |
| W1    | 1-5    | ACGTTGGATGACGAGACCGTTGTTAATTGAG | ACGTTGGATGCAAGATTACCCATCTCCCTG   | gGTATTGAGATAGAGACACTGCAAA  | T         |
| W1    | 9-111  | ACGTTGGATGTCTATACTACACAGTACCCG  | ACGTTGGATGACCAATTGTGGACAACCAAAAC | TCTATACTACACAGTACCCGATACTT | C         |
| W1    | 1-1    | ACGTTGGATGTCCATGGAGGGAAAGTGAAG  | ACGTTGGATGAGAACGGAATGATGGACCAC   | ttATGGAGGGAAAGTGAAGAGTGTIT | C         |
| W2    | 2-24   | ACGTTGGATGGCCAGTAAATTAAGCGTGTGC | ACGTTGGATGTGGAAAGCAGAAAAAGTGGG   | TCTACACCATCTCCCA           | C         |
| W2    | 7-53   | ACGTTGGATGTTTCTAGCAITACGGCGAGGG | ACGTTGGATGATGTTCTCGTGTGCTGTTG    | ATAAACGACCCCACTC           | G         |
| W2    | 18-162 | ACGTTGGATGCTAGGGTTAAGGCTAATTCAG | ACGTTGGATGGCATCTTTCATTTGGGTGTAAG | GATGTTTTCGGCCAAAAG         | C         |
| W2    | 7-30   | ACGTTGGATGAGTCCAAGCGCTGTGCCATC  | ACGTTGGATGTGAACCTCATCTGGGTAACG   | tGCGTGTCCATCTCTGAC         | A         |
| W2    | 5-192  | ACGTTGGATGTTCTTCTGCTGTGTGTGTC   | ACGTTGGATGCGCTATGCTCACAAGAAAAC   | TGACCGTGGGCTATCA           | G         |
| W2    | 7-48   | ACGTTGGATGAGCGGCAAGTAAAGGGTTTG  | ACGTTGGATGCGGTATACTCCACTCTGAC    | AGGGTTTTGGGAATGTGTG        | C         |
| W2    | 7-50   | ACGTTGGATGCTTAATGGAATCAGTGCATC  | ACGTTGGATGTTCTCTGCAAGATGGCTTC    | TCAGTGCATCTCTCACT          | T         |
| W2    | 7-38   | ACGTTGGATGTGTTCGGAAAGTCTGGATG   | ACGTTGGATGCAGATCTTGTATGACGTGGC   | acGCGGTACGCTAGATGA         | G         |
| W2    | 2-213  | ACGTTGGATGTGGCAGATAGCTCATCATC   | ACGTTGGATGTGCAGGTTCCATAACAGAG    | TCCGTAGCTCTTAACTGACA       | G         |
| W2    | 23-221 | ACGTTGGATGGCTTCTCACCACAGAAATACC | ACGTTGGATGTCCAGGAAATGTCAAGAGG    | CAGAAATACCACAATTGAAACA     | C         |
| W2    | 6-99   | ACGTTGGATGCTTGGCCACACTCATCCTTG  | ACGTTGGATGCACACTCCTCACAAGAAC     | ggGTGTGTGACTGTGGCTTG       | G         |
| W2    | 3-77   | ACGTTGGATGCATAAGATAGTCCAAAGCTG  | ACGTTGGATGCTGCTCTTTTATGTAATC     | tgCCAAAAGCTGACAATGTATG     | C         |
| W2    | 2-22   | ACGTTGGATGCACAGAACACATCGTTCCACC | ACGTTGGATGAATCTATGTGGATGGGAGGG   | tTAGAGCAGATCAGAGATAC       | A         |
| W2    | 19-168 | ACGTTGGATGCTGGTGAAGCTTACCAAC    | ACGTTGGATGTGAGAACATCTTGGCCG      | atCCTTACCAACTCCAGTGCAT     | G         |
| W2    | 9-112  | ACGTTGGATGCGATGTGGAACTTTACATTC  | ACGTTGGATGGTTTTGGCTTAAACAATAT    | gTAAGTCCCAAACTTTACAAC      | G         |
| W2    | 8-65   | ACGTTGGATGGTCAITTCATTTGGTCTCTG  | ACGTTGGATGTTACACACGTGATCTCTGG    | GGTGGCTCTGAGATTAATAATA     | G         |
| W2    | 22-211 | ACGTTGGATGTGACACACCGTAACCATGAC  | ACGTTGGATGACTTTACTGTTGGCAACCG    | CCGTAACCATGACGATGACCTGT    | G         |
| W2    | 11-197 | ACGTTGGATGAATTTGGTACCAGGCTAC    | ACGTTGGATGTGTCATTTGCTTGTGGTGG    | agAAGAAAACACTGAACAAAAGAC   | T         |
| W2    | 6-101  | ACGTTGGATGACGAGTACGTTCTCCCTTAC  | ACGTTGGATGAGGCTTGTGTGGTCTCTC     | ccGTACGTTCTTCTTACATGAC     | C         |
| W2    | 19-234 | ACGTTGGATGGTGAATTAATGGCGGGAAAC  | ACGTTGGATGCGAATCTCTGCAACGAAAC    | TATGTTCTAGTCTAATGAGTTTAC   | G         |
| W2    | 11-126 | ACGTTGGATGTACTTAGGGACTCCGTAGAG  | ACGTTGGATGATCCCTGCAACCCGATAAAC   | ACTCCGTAGAGAGACGTTCCAGGG   | T         |
| W2    | 4-217  | ACGTTGGATGGCTGACTCAGGGTGTATTTC  | ACGTTGGATGCTGTGACAGAGAGGAGATAAGG | aAGGGTGTATTTCTATGAGAAAAA   | C         |
| W2    | 19-208 | ACGTTGGATGCTTGCAGTCAATTGTTGGC   | ACGTTGGATGCAGTGGGCACATTTGGAAG    | cTGGCATAGATGTTCCAGTTTCAT   | C         |
| W2    | 23-186 | ACGTTGGATGCATCTATCCACCCAAACACC  | ACGTTGGATGAGAACTCTGAGTCTCAGGC    | cCACCACAGAACGTTCTATGTGCTG  | C         |
| W2    | 2-249  | ACGTTGGATGTGCAACACTAGTCCACAGATG | ACGTTGGATGGGCGCAAAATATCAACACCG   | gAACACTAGTCCAGATGATATAATA  | G         |
| W2    | 9-196  | ACGTTGGATGATGGAACAGAAAGTATAGCTC | ACGTTGGATGGAGGACATTTTATGCCGGT    | GGAAACAGAAATATAGCTCATTATTA | G         |
| W2    | 5-95   | ACGTTGGATGTATAAGAGGGGCTACTCTC   | ACGTTGGATGATCCCTAGTCCACAACACAGC  | cGCTCTACTCCATACCTAAAAACTAA | C         |
| W2    | 19-237 | ACGTTGGATGGGCTTGGCCTAATCTAGTTC  | ACGTTGGATGTTATCCGAAAACACACCCGCC  | ACCTTATTTCTATTGGTTCCTGCCAT | G         |

|    |        |                                  |                                    |                             |   |
|----|--------|----------------------------------|------------------------------------|-----------------------------|---|
| W3 | 4-89   | ACGTTGGATGGTATGTCGTCTGTGCCGGA    | ACGTTGGATGTACCAATCATCTGTCTCTC      | CAGTTGCTTCCACTG             | G |
| W3 | 7-36   | ACGTTGGATGAAATATGGTCACTGAGAGGG   | ACGTTGGATGTCAGGAAATTAACAATCAAAG    | GCAGTTCTTTTAAAGC            | G |
| W3 | 13-136 | ACGTTGGATGATATAAGCCAGCAGAGCAGAG  | ACGTTGGATGGTGAAGCTCCCTTGGAGCAG     | CAGAGCAGAGGAGAGGC           | A |
| W3 | 9-114  | ACGTTGGATGGTACAGCAGCTCTGTTCAAGC  | ACGTTGGATGCTAAATGAGCTTGGAGTGGG     | AACATGGTAAATAGCCAC          | G |
| W3 | 7-55   | ACGTTGGATGGCAATTTGCTCTTCTGTCTC   | ACGTTGGATGTATGGATGGAGAGCAITTC      | CTCTGTGTCTGCGCTCT           | C |
| W3 | 15-148 | ACGTTGGATGGTGGATCGGTGGTTGAC      | ACGTTGGATGGCAAACCTCACACTGTGCTG     | ccGGTCATCATCGGCTTG          | G |
| W3 | 17-156 | ACGTTGGATGGTCAGTTATCTGCTGAGATGG  | ACGTTGGATGGCATTACGACACAAATGCAG     | acTCTGAGATGGAGGATA          | C |
| W3 | 13-138 | ACGTTGGATGGTGGATACGGTTCAATGTAAG  | ACGTTGGATGGGGATTTCAAACGATGGTG      | ggGTTTCATGTAGGCTAGAC        | T |
| W3 | 10-122 | ACGTTGGATGAACTGCTGTGTTTCAAAGG    | ACGTTGGATGGGAAAAGGTAACACCTCTG      | TTGGTTATGGCGCACTTAA         | G |
| W3 | 7-31   | ACGTTGGATGGTGGAGAGATGAAAGGTC     | ACGTTGGATGTTTACGGAGTTGCAAAAAGCC    | caATGAAAGTCTTCAAGTCG        | A |
| W3 | 23-225 | ACGTTGGATGGTGGACAGAGTTTGGAGAG    | ACGTTGGATGGCTCTCTGCTTGGTGTAG       | aaGTTTGGAGGGTATAGTA         | T |
| W3 | 23-179 | ACGTTGGATGGTTCGCGGGTCCCGATCTT    | ACGTTGGATGGTGTACTTGGAGCAGGGG       | cGGTCCCGGATCTTCAAACC        | A |
| W3 | 6-96   | ACGTTGGATGGTACTGAAAGGTTGTGTGCTG  | ACGTTGGATGGTGGTCCACTTGGAGCATTAG    | GTGCTGCAAAAACATGAAACAAG     | T |
| W3 | 15-149 | ACGTTGGATGGTAACTAGGTTCACTGCTG    | ACGTTGGATGGACTTCTCTGACACTGCTG      | ACTGCTGATTTCTCATGTGCTCC     | T |
| W3 | 11-127 | ACGTTGGATGGTCAAGGTAAGTTCAGAAAC   | ACGTTGGATGGTAGCAGCTTGGGGTTCAATC    | GGCAAAAACAAAGAGCCAAAATTC    | C |
| W3 | 1-10   | ACGTTGGATGGTGGTAGCATGGTAAATCG    | ACGTTGGATGGTGCATGGATGACTCTTGG      | tgTGGTAAATGGAAATAATCT       | G |
| W3 | 12-71  | ACGTTGGATGGTAGGCTCACATCAAAGTGGC  | ACGTTGGATGGTGCACAGAGAGTAAGACAG     | CTGCATCAAAGTGGCATTACA       | G |
| W3 | 1-2    | ACGTTGGATGGTACTGGATGGATGGTGCAC   | ACGTTGGATGGTGCAGGCAATTAAGTCTGA     | TGGTGGCAGGAGATATCAAAT       | C |
| W3 | 7-36   | ACGTTGGATGGACGCTTTGCTGAGTGTG     | ACGTTGGATGGTGTGCTGTGTATGGTGC       | TGTTGGTGGACAAGGATGTAGTC     | C |
| W3 | 12-250 | ACGTTGGATGGAAAGGTTAGAGATGCTGTC   | ACGTTGGATGGGCCATCAGCAATGATCTG      | CTGCTTTTGGAGATACAGGCCAAA    | G |
| W3 | 1-4    | ACGTTGGATGGAAATAGCAGTGGCAGAAAGG  | ACGTTGGATGGATCATCCCTTTTGGAAACCC    | gTAACAGTTCAATGATAGGAGAGAG   | C |
| W3 | 7-45   | ACGTTGGATGGTCTTCAATGATAAACCTGCC  | ACGTTGGATGGTGGATCAAGTTTGGCATGG     | ctTTCATGTATAAGCTGGCAACACT   | G |
| W3 | 3-214  | ACGTTGGATGGCAGCAGACTGTGATAGGTTT  | ACGTTGGATGGGCTCATGGAGCAGAAAGTTC    | egCAGATCTGATAAGTCTTCTTCA    | A |
| W3 | 13-137 | ACGTTGGATGGTCTGTATGACACAGCCTTC   | ACGTTGGATGGTGGCTCTCTGTCTGAGGTTT    | gTGTAGTATGCAATAGCAAAAATTC   | G |
| W3 | 3-239  | ACGTTGGATGGCAITTCAGTCTCCAGGTTGGC | ACGTTGGATGGATAGATGGCTGATGGAG       | acCTGGTGGTGAACAGAAAGCCCT    | C |
| W3 | 16-154 | ACGTTGGATGGGCTGGATATAGATAGACAC   | ACGTTGGATGGCTGTGTGTTATCTTAAAGCTC   | GGTGGATATAGATAGACACTAGACAT  | C |
| W3 | 22-210 | ACGTTGGATGGTTTTCCAGGGTGGCTTCTC   | ACGTTGGATGGAGGTTGTGTGTGGTAAAGG     | caAGGGTGGCTTCTCATTTCTATCTAC | A |
| W3 | 7-58   | ACGTTGGATGGAAAGATGGCAGTCTCTTGGC  | ACGTTGGATGGCAGGATCAAGTTTGGGCGAG    | haTGTCAAATATGATTTTTTTTTCC   | T |
| W4 | 19-233 | ACGTTGGATGGTGTGTTTCTGCAAGGCAAAAC | ACGTTGGATGGCTCTCTCTTGGCAGTACTTC    | CAGCATGGCCAGCAGCG           | C |
| W4 | 16-153 | ACGTTGGATGGATTTCTGTCAGCAGAGTGGC  | ACGTTGGATGGACATGTTTTTCCATAGGGCC    | CAGAGTGGGGAGGATCA           | C |
| W4 | 10-115 | ACGTTGGATGGCCAAAGCAGCAGATAACTC   | ACGTTGGATGGCTTTGGCGAGAAAGTGTG      | GTGCTTGGCTTTGGCTAC          | A |
| W4 | 1-7    | ACGTTGGATGGTGGAACTTTTTTCAGCAGAG  | ACGTTGGATGGGCACTCTCCAGGTTCTTAAAG   | TTGCTGAAAAAAGGCTTG          | C |
| W4 | 21-222 | ACGTTGGATGGTGTCTGCTGTTTGGCTAAG   | ACGTTGGATGGAGTAAAGCAGCAGTAAAGTCC   | GATATCTGGATGGTAAAGG         | G |
| W4 | 20-171 | ACGTTGGATGGCAGAGAACTGGAGGAGAG    | ACGTTGGATGGCATTCTTCTTACCTAGAGGC    | GGGCGAGGGTTTAAATGAG         | G |
| W4 | 7-39   | ACGTTGGATGGTCTTCTCTGAGGTTGGTGG   | ACGTTGGATGGTCACTGCTCTTCACTCTCC     | AGGTTGGTGGGCTTCAAGT         | G |
| W4 | 12-68  | ACGTTGGATGGACAGGTTGAGAGCAGGCTTTG | ACGTTGGATGGTGCACCAACAGTGGCAAAATGG  | aaGGCTTTGGAGAGTGGT          | T |
| W4 | 8-229  | ACGTTGGATGGTGGGTTGCAATGGAGTAAAC  | ACGTTGGATGGAGAAAGCAGTGGATGGG       | TGCAATGGATAACTAGCCCT        | A |
| W4 | 14-141 | ACGTTGGATGGGCACTGAGAGAACTTAAAC   | ACGTTGGATGGATGATGCAAAATGCTCAGC     | GTGGCATCATGGGATACAA         | C |
| W4 | 6-97   | ACGTTGGATGGTGGCAGTGGACACAGATGG   | ACGTTGGATGGTATGATGGAGTGGCAGAGC     | gAGGTTCTCTTAAAGTCTGGC       | G |
| W4 | 7-46   | ACGTTGGATGGTGGGCTATCTTGTGCTGG    | ACGTTGGATGGATCTGGAGTGGTTGTGGAGC    | acGGGAGGGGTTGAGCAGCTTC      | G |
| W4 | 11-128 | ACGTTGGATGGAGGACAGGCTGGAGCTGGG   | ACGTTGGATGGACACTTTCGGTGTGGTGG      | aaGGGGAGGCTGGGGCTGCA        | G |
| W4 | 7-34   | ACGTTGGATGGACAGGTTGGACACATCATC   | ACGTTGGATGGTGTAGGTAAGGATGGCTGG     | tgGCATCATCTATAAGGGCCG       | C |
| W4 | 12-70  | ACGTTGGATGGGCGTATGGCTCATGTTTTG   | ACGTTGGATGGAGCTAATTCTTGGGTAAGTGG   | GTCAACCAAGCATAAAGGTTGTC     | A |
| W4 | 12-241 | ACGTTGGATGGCCACAAACTCTTCAATGGC   | ACGTTGGATGGCAGGATGAAAGCAAGAGAG     | gggTCAATGGCTTGAAGGTTAA      | G |
| W4 | 5-90   | ACGTTGGATGGCCAAAGCATGGTCAATTTTT  | ACGTTGGATGGCCAGCAAAATGGAAATCTAATTT | cTTCATACATTTTCTGTFTT        | C |
| W4 | 3-215  | ACGTTGGATGGTCCAGGTTGAGAGAGAACG   | ACGTTGGATGGTCCAAAGCTGGTCTTGTGG     | gTGGGGTGGCTCTTTTGGGGGG      | G |
| W4 | 8-47   | ACGTTGGATGGTACTCTCTATAGCAGTGGC   | ACGTTGGATGGCAGAGTGAATAGAGAGCTCC    | cTCTCTATAGCAGTGGCTATAAA     | C |
| W4 | 21-177 | ACGTTGGATGGAGAGAGAGTCTCTGGATGG   | ACGTTGGATGGATGGTCCCTGGAAACATTGAG   | gggAGTCTCTGGATGGTGGATC      | A |
| W4 | 10-121 | ACGTTGGATGGACAGACTCTTGAACCAAGGG  | ACGTTGGATGGTAGACATCTCACAGCCAAAC    | ggAAAATCAGGGAAAAAATAGGATGT  | G |
| W4 | 1-8    | ACGTTGGATGGTCAGTGTCTTCACTTCAACC  | ACGTTGGATGGTGTGGTGGTGGAGAAATTC     | aTTCAGCATAAGCCACTTCAAGCTGG  | C |
| W4 | 6-100  | ACGTTGGATGGTTTTGGAGGAAAGCCAGGTC  | ACGTTGGATGGCTTAAACAGCCACAGCCAGC    | gTGGAGGAAAGCCAGTGGGCTGG     | G |
| W4 | 19-166 | ACGTTGGATGGATGACTCATAGGCTCAGC    | ACGTTGGATGGACATCATGCTGGACAGCAGAG   | aaGGGAAATGGTAACTATGGTGGATGA | G |
| W4 | 8-39   | ACGTTGGATGGCTGGATACAAATGGCAAG    | ACGTTGGATGGGTTGAAAGTCTTGAAGTCC     | aaCTAAATAAACTTTGGCTGCAAT    | C |
| W4 | 12-251 | ACGTTGGATGGAGGGAAATGGCTTAAACCTG  | ACGTTGGATGGTCTAGTAGGTTAGGTTACAG    | ggTTTTTGGCTTGGTGAAGAAAGGGG  | C |
| W4 | 13-139 | ACGTTGGATGGTCTGACTGGTGAACATTGG   | ACGTTGGATGGCCAGAGCAGATGTTAGTACA    | gAAAATAGCTTAAAGCAATATATGTAA | T |
| W4 | 16-155 | ACGTTGGATGGCCAAAGGGATATAAGAAC    | ACGTTGGATGGCAGCTCTGACTTTTATGG      | cAGATAATGGCATAAATATCTTCTAT  | T |
| W5 | 9-195  | ACGTTGGATGGTGGTGCAGACATAAGGTTGC  | ACGTTGGATGGTGTGGTGCAGTTAAGAGGG     | CATCCATGGTGGCATTG           | G |
| W5 | 9-110  | ACGTTGGATGGTGGTGGTGGTGGTGGTGG    | ACGTTGGATGGGCTTGGATGGCAAGGTTCTCT   | AGGCTGGCAGAGCAGAG           | A |
| W5 | 2-26   | ACGTTGGATGGTCAATGAGCAGGAGGTTGC   | ACGTTGGATGGAGAGAGAGAGCTGGAAAGAG    | TGGGCAAGGGGTTGGAG           | C |
| W5 | 14-140 | ACGTTGGATGGGTACAATTAACAATGGCTCC  | ACGTTGGATGGTGTAGGGCCAGTTATGGTGG    | GGCTTAAAAAGGCAATTTG         | G |
| W5 | 16-152 | ACGTTGGATGGTACAGATCAGCAGAGAGAGAG | ACGTTGGATGGATGGAGAGGCTGGCCATTAAG   | aaGTTGGGGCTTAAAGGAGA        | G |
| W5 | 4-218  | ACGTTGGATGGTGGCTATGATCTAAATTC    | ACGTTGGATGGGATACTTCCAAATGGAAAGG    | gCTGGTAAAGGAAAGGAGA         | A |
| W5 | 12-73  | ACGTTGGATGGTGGCCAGATGGTATGGAAAG  | ACGTTGGATGGTGGTGGTGGTGGTGGTGG      | ATGTGCTAATCTTGGTGTG         | C |
| W5 | 20-170 | ACGTTGGATGGCAGTGGCTTTTCCAGGTTCC  | ACGTTGGATGGTGTATGGTGGTGGTGGGAG     | acTTCAGGCTCTTGGCTGGA        | C |
| W5 | 7-40   | ACGTTGGATGGTGAACAGCACTGTGTCAAGG  | ACGTTGGATGGTCCAGCAGATGGTGGCAATAC   | GGTGGGGCTGACTTAAAGGGA       | G |
| W5 | 20-220 | ACGTTGGATGGTAAATGCTCCCTGAGCTCC   | ACGTTGGATGGAGAAACAATCCATAGAGAGAG   | ggGAGAGCTGCAAAAAGTTA        | C |
| W5 | 12-248 | ACGTTGGATGGTGGTGGAAAGGATGGAGAG   | ACGTTGGATGGTGGCAGGACATGGTAAATG     | TTGGATTAATAGGCTGGTCA        | G |
| W5 | 3-78   | ACGTTGGATGGATTCAGTCTTGTGTCTGGCC  | ACGTTGGATGGTAGAGGGCTGGAGATGGTGG    | caGGTGTCTGGCTGGGGT          | A |
| W5 | 4-189  | ACGTTGGATGGGTTGGCCACACTTTTTGGT   | ACGTTGGATGGTCAACAGAGATGTAAGTGG     | cccaACACTTTTTGGTCCAGGT      | G |

|    |        |                                  |                                  |                             |   |
|----|--------|----------------------------------|----------------------------------|-----------------------------|---|
| W5 | 15-146 | ACGTTGGATGGTTTCAAATGAGGAGCCAGC   | ACGTTGGATGATCCCGAAAGTGTACAAAAG   | aggcGCCAGCTGGATAAAGTCT      | C |
| W5 | 4-228  | ACGTTGGATGCACTGAAAGAAAGAGACGGG   | ACGTTGGATGTTACCAGTGGTGGACACTC    | ccctGCCCCCCCAGCAGATGGT      | C |
| W5 | 11-199 | ACGTTGGATGTTCTGACACAAATGCTTCTAC  | ACGTTGGATGAGGCTACATGTTGCCCTCTG   | TGACAACCACTTTAGATATGTCT     | C |
| W5 | 7-57   | ACGTTGGATGGCAGGCATGTTTGTGAACAG   | ACGTTGGATGATCTGCCFLACAATTGCCGAG  | acgggCGTGLACGACTCGTACTG     | C |
| W5 | 4-88   | ACGTTGGATGAGGCATGTAGGAGTAGAAGG   | ACGTTGGATGTCCATGCCCATCTACACCTT   | ggAGGAGTAGAAGGCGTGTGC       | C |
| W5 | 8-62   | ACGTTGGATGCACCTGTTCTCTACACAAAAGA | ACGTTGGATGGGACCCAAATGTATTCTGT    | ctcgCTACACAAAAGAACAGAGAAAT  | T |
| W5 | 9-109  | ACGTTGGATGTGCACCTGATGCTAGTCTG    | ACGTTGGATGCCCTAAGAAAGGTCTTACCAC  | ggcgGATGCTAGTCTGAGCTCGGT    | C |
| W5 | 3-82   | ACGTTGGATGAGGCCCTCTGCAATTTGAATGG | ACGTTGGATGGGAAGGAAGAGAGGAGTTAG   | ccctGCCCTTTTGCATGTCTGCTTGT  | C |
| W5 | 8-64   | ACGTTGGATGTCTACCAGATGATTGGTTCC   | ACGTTGGATGCTCCCTTCTCTCAAGTAAATG  | ccacTGGTTCCTTATACTGTTTAAAT  | C |
| W5 | 2-18   | ACGTTGGATGCCCTTCTACTGACGGTGAATA  | ACGTTGGATGTACTGTCCGAAAACGGTTC    | ggccCTGACGGTGAATAACTATGTA   | C |
| W5 | 12-69  | ACGTTGGATGGAAACACATTAATGCTTCCCTC | ACGTTGGATGAAAGCAGATGATTATCACAGC  | tcctTTAATGCTTCTCATATCTTTT   | C |
| W5 | 4-188  | ACGTTGGATGCATAGAGTAAATCATGAGG    | ACGTTGGATGACATGCTAACCCTGTGTACC   | ggTCATGAGGTTAATAAACCCCTGTTA | C |
| W5 | 23-184 | ACGTTGGATGAGTAACTCAATAAAGCGCTG   | ACGTTGGATGGGACTATATCAACAGFLAGG   | CGCTGTAACATGAAACGATTAAGTATG | A |
| W5 | 2-25   | ACGTTGGATGGTACCTCTTCCAAGTACTTT   | ACGTTGGATGTATGTGCACATGCAGAACGG   | ccacCTCTTCCAAGTACTTTAAAATC  | G |
| W5 | 7-37   | ACGTTGGATGCAGCGGLAAAAACAATGTCC   | ACGTTGGATGCCACTGTTCGTGATTTGGG    | ccgCATCATAGTACCTATGGTATATT  | C |
| W6 | 10-120 | ACGTTGGATGATCTCTAGCCAGAGCCCTGT   | ACGTTGGATGTAGACCAGAGATGAAAGGG    | GCCTCTGTCTTGGCCC            | G |
| W6 | 19-167 | ACGTTGGATGATCAATCGCCCTGTTTGGTC   | ACGTTGGATGGCTTTCGCAAGACCACCAAC   | TGGTCCGCTCTCTGCG            | G |
| W6 | 18-160 | ACGTTGGATGTCTGGACGTCGCCGATGAAAG  | ACGTTGGATGACTACAGTGTCTGAGAAAG    | AGCGAGCTGTTTGTGGA           | C |
| W6 | 15-236 | ACGTTGGATGCAGGTGTGTGAGCTGCTGG    | ACGTTGGATGTCTTACATGTGGAGTCTCTG   | aTGCTGGCCACACAGAAC          | C |
| W6 | 15-203 | ACGTTGGATGAGAGCCAGCGTAACTGAAAC   | ACGTTGGATGGAAAGAAAGTGCAGTGCAGG   | cCAGGGAGACACGCTTGA          | C |
| W6 | 1-3    | ACGTTGGATGAAAGTCCAAAAGGTTGGACAC  | ACGTTGGATGTGTGTGTTTGTGTGCGTG     | TGGACACCCCTCTCAAT           | T |
| W6 | 7-44   | ACGTTGGATGTGAGTTGGACATGAACCGAG   | ACGTTGGATGCAGCCACATTTACACATGCC   | TGAAACCGAGTTTGTGGCT         | G |
| W6 | 10-116 | ACGTTGGATGATCGTTAGCAAGGGATTCCG   | ACGTTGGATGCTTCCCTGTGTCTGCAATTC   | AAGTAAAGTATTGCTTGGC         | T |
| W6 | 4-191  | ACGTTGGATGTACATGCAGCCCCAGTCAAC   | ACGTTGGATGGACGACGATGTTTCTTATC    | CCCCAGTCAACAGGTGCCCA        | G |
| W6 | 11-123 | ACGTTGGATGTCTCTCAGGACTCGGTGAAC   | ACGTTGGATGTGCTTCTCTGATGAAGTCTCT  | ccACAACGTGCTGCTGCCGC        | A |
| W6 | 9-113  | ACGTTGGATGATCGACTGAAACGCTTGAATGG | ACGTTGGATGCAGGATTCCTCACTCTG      | gggAGACAGGTGAACGTGACC       | C |
| W6 | 14-143 | ACGTTGGATGCCGCAATGGAATAGAAATAC   | ACGTTGGATGCAACAACCCGACTACTATAAC  | AGAAATACACACCAAATACAA       | G |
| W6 | 22-180 | ACGTTGGATGGCTGGGATGTAATTTAGATACG | ACGTTGGATGCACTGCACACCAATGATCTG   | CGAACGTAGGTTTAAAAAAA        | C |
| W6 | 7-42   | ACGTTGGATGCTGGAAACGCAATATCTCTG   | ACGTTGGATGTAGGGATAAACCATCAGGGC   | gggaTACCAGGGAGATTGGA        | G |
| W6 | 1-12   | ACGTTGGATGGGGACACACAAAATCTCTG    | ACGTTGGATGCCCTCAGGTTTTTTGGATCAC  | AACCTTATCACTGTGAAAATGA      | C |
| W6 | 18-246 | ACGTTGGATGAAATCACAAGGCCACCCAGG   | ACGTTGGATGTTAGCGTCGACTAATATTCC   | cccaAGGCCCCCGCTCGTCCGTT     | G |
| W6 | 23-212 | ACGTTGGATGGGCAAGGATCAGTGACATAG   | ACGTTGGATGCTAGTTTTTCTGCAGCAAAAGC | TCITTGAAAAACAACACTACTGAT    | G |
| W6 | 16-150 | ACGTTGGATGCAGAAACAAATAGAAAACAGC  | ACGTTGGATGTGGTTTTGGTGGAAACAAGAGG | ttCAAATAGAAAACAGCTTCAAT     | A |
| W6 | 12-76  | ACGTTGGATGTTCTTACATGGTTTCAATGGG  | ACGTTGGATGCCCTTATAGGACGCTTTGCAC  | gggAAGGTATCTCAGAGTCTTTG     | C |
| W6 | 7-41   | ACGTTGGATGCCATCAAGAAATAGCCTAAAG  | ACGTTGGATGATCCCGGCTTTGTTTTCTG    | ggggTAGCCTAAAGGATTAACCTGC   | T |
| W6 | 2-14   | ACGTTGGATGTAGACATGTACCCCGACTTC   | ACGTTGGATGGTGGAACTCACATCTCTCAG   | taccTGTACCCCGACTTCTCCGACG   | G |
| W6 | 6-98   | ACGTTGGATGTACAGAAAGACCTTAAACCTC  | ACGTTGGATGCCAATTAGAACCAATTTGCAG  | ctcAGGACCTTAAACCTCTAAAGT    | G |
| W6 | 22-181 | ACGTTGGATGCGTCAATCTATGGACTCGG    | ACGTTGGATGATCTTCTATGGGAAACAAG    | GACTCGGATACATAGATATATAACG   | G |
| W6 | 7-193  | ACGTTGGATGGTATGCTACGAGGTTAATG    | ACGTTGGATGATGAAGGCCCTTACTACAG    | tAAACATGATACAGAAATTAAGTTAC  | T |
| W6 | 21-209 | ACGTTGGATGGACCTCAGTAGGGAGGAATC   | ACGTTGGATGCCAAACTGTACCATGCAAC    | gggAGAATACACAAAACATCAAATG   | G |
| W6 | 19-165 | ACGTTGGATGATGTCAACTGATAACGCAAG   | ACGTTGGATGCCAGTCAATTTTTTTGAG     | ggAATTAATGATATTTTCAGGGATT   | C |
| W6 | 18-207 | ACGTTGGATGGTATAATTTGCAATTTATGCTC | ACGTTGGATGTGGACACATGAAACTGC      | ccTTATGCTCTTAAATTTCTCTGTAC  | A |
| W6 | 22-183 | ACGTTGGATGTGACGCTCACCTGGTGGTC    | ACGTTGGATGAGCTTATCAGAGCCAGCAG    | cttaaGGTCACTTGGTGGTCACTGCC  | A |

Supplementary Figure 1 Primer sequences for all SNP assays.

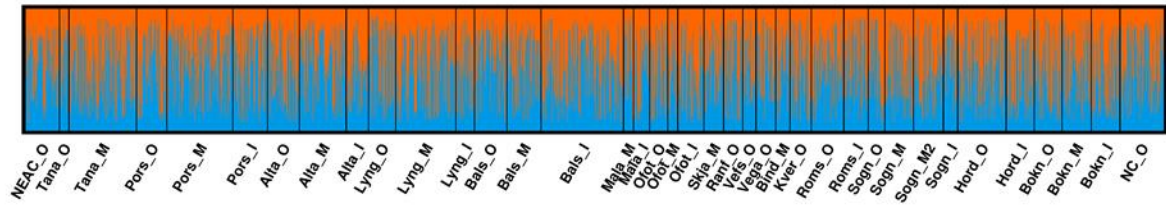

Supplementary Figure 2 STRUCTURE plot of Neutral markers with K=2a)
